1                    **Hearing pathways in the Yangtze finless porpoise, *Neophocaena***  
2                                            ***asiaeorientalis asiaeorientalis***

3  
4 T. Aran Mooney<sup>1</sup>, Songhai Li<sup>2,3,\*</sup>, Darlene R. Ketten<sup>1,4</sup>, Kexiong Wang<sup>2</sup>, Ding Wang<sup>2</sup>

5  
6  
7 <sup>1</sup>Biology Department, Woods Hole Oceanographic Institution, Woods Hole, MA, 02543 USA

8  
9 <sup>2</sup>Key Laboratory of Aquatic Biodiversity and Conservation of the Chinese Academy of Sciences,  
10 Institute of Hydrobiology of the Chinese Academy of Sciences, Wuhan, 430072, People's  
11 Republic of China

12  
13 <sup>3</sup>Marine Mammal Research Program, Hawaii Institute of Marine Biology, University of Hawaii,  
14 P.O. Box 1106, Kailua, HI 96734 USA

15  
16 <sup>4</sup>Department of Otology and Laryngology, Harvard Medical School, Boston, MA 02114, USA

17  
18  
19 **Keywords:** Sensory, auditory brainstem response, noise, marine mammal, odontocete,  
20 communication

21  
22 **Running title:** Hearing pathways in the finless porpoise

23  
24  
25  
26 \* Present address: Marine Mammal and Marine Bioacoustics Laboratory, Sanya Institute of  
27 Deep-sea Science and Engineering of the Chinese Academy of Sciences, 62 Fenghuang Road,  
28 Sanya 572000, China

## 1 **Summary**

2 How an animal receives sound may influence its use of sound. While “jaw hearing” is well  
3 supported for odontocetes, examining how sound is received across the head work has been  
4 limited to a few representative species. The substantial variation in jaw and head morphology  
5 among odontocetes suggests variation in sound reception. Here we address how a divergent  
6 subspecies, the Yangtze finless porpoise (*Neophocaena asiaeorientalis asiaeorientalis*) hears  
7 low, mid, and high frequency tones, as well as broadband clicks, comparing sounds presented at  
8 different locations across the head. Hearing was measured using auditory evoked potentials  
9 (AEPs). Click and tone stimuli (8, 54, and 120 kHz) were presented at nine locations on the  
10 head and body using a suction-cup transducer. Threshold differences were compared between  
11 frequencies and locations, and referenced to the underlying anatomy using computed  
12 tomography (CT) imaging of deceased animals of the same subspecies. The best hearing  
13 locations with minimum thresholds were found adjacent to a mandibular fat pad and overlying  
14 the auditory bulla. Mean thresholds were not substantially different at locations from the  
15 rostrum tip to the ear (11.6 dB). This contrasts with tests with bottlenose dolphins and beluga  
16 whales, in which 30-40 dB threshold differences were found across the animals’ heads.  
17 Response latencies increased with decreasing response amplitudes, which suggests that both  
18 latency and sensitivity are interrelated when considering sound reception across the odontocete  
19 head. The results suggest that there are differences among odontocetes in the anatomy related to  
20 receiving sound, and porpoises may have relatively less acoustic “shadowing”.

21  
22  
23

## 1 **1. Introduction**

2 In terrestrial mammals, structures such as the pinnae and ear canal serve to conduct sound  
3 to the middle and inner ear (Angell and Fite, 1901; Roffler and Butler, 1967). The shape of the  
4 outer ear influences the spectra, amplitude, and arrival time of sounds (Müller, 2004). Variations  
5 in these cues aid animals in sound source localization and consequently important biological  
6 activities, including locating predators and prey, navigating, and communicating with  
7 conspecifics. Animals may also use directionality cues to limit the adverse impacts of noise  
8 exposure by turning away from sound sources to decrease received levels of noisome sounds  
9 (Heffner and Heffner, 1992).

10 Odontocetes (toothed whales, dolphins and porpoises) lack external pinnae. Most  
11 evidence indicates they receive sound using specialized adaptations around the lower jaw. For  
12 example, early anatomical studies proposed that sound preferentially travels through an acoustic  
13 window of the pan bone to the lower jaw (Norris, 1968). Fats within the odontocete mandible  
14 were similar to seawater in acoustic impedance, suggesting these fat bodies preferentially  
15 conducted sound to the inner ear (Varansi and Malins, 1972). Biochemical analyses of the lipids  
16 within odontocete heads show that the “acoustic fats” have a specific topographical arrangement  
17 within the lower jaw, perhaps affecting sound speed to channel incoming sound to the ears  
18 (Koopman et al., 2006; Koopman and Zahorodny, 2008). The jaw hearing hypothesis was  
19 supported by intracranial-recorded evoked potential and cochlear action potential studies which  
20 demonstrated good hearing sensitivity from the dolphin lower jaw (Bullock et al., 1968;  
21 McCormick et al., 1970). Sound transmission measurements through head tissue samples  
22 indicated a concentration of sound through the throat and jaws (Norris and Harvey, 1974).  
23 Odontocete jaw hearing has been supported with a psychophysical echolocation study and  
24 detailed, non-invasive physiology of dolphin received sensitivity (Brill et al., 1989; Møhl et al.,  
25 1999). Anatomical studies have shown discrete fat lobes associated with the lower jaw that vary  
26 in size and shape in each species (Ketten, 1994). The mandibular fat hearing hypothesis has been  
27 supported by physiological data, particularly for the concept of an additional pathway near the  
28 bulla, which preferentially receives lower frequency sounds (Popov et al., 2008).

29 While the propensity of evidence clearly supports the foundation of the “jaw hearing”,  
30 previous research has tended to focus on few species, particularly on bottlenose dolphins  
31 (*Tursiops truncatus*). Yet, there are clear variations in the jaw and head morphologies of

1 odontocete species suggesting at least subtle variation in how sound is received. Little attention  
2 has been paid to how divergent cetacean species, with varied jaw morphologies, receive sounds  
3 despite indications that they receive sound differently. For example, the harbor porpoise  
4 (*Phocoena phocoena*) has a significantly wider receiving beam than the bottlenose dolphin  
5 (Kastelein et al., 2005). The beluga (*Delphinapterus leucas*) demonstrates lowest hearing  
6 thresholds not from the lower jaw as in dolphins, but rather at the tip of the lower rostrum  
7 (Mooney et al., 2008). Despite these physiological differences, no study has yet to  
8 comprehensively examine head/jaw received sensitivity while providing a comparison to  
9 auditory anatomy and the location of “acoustic” fats.

10 Differences in how each species of odontocete receives sound may be significant as the  
11 shape of sound receivers can greatly influence directionality, localization, and frequency  
12 sensitivity (Au and Hastings, 2009). Regulatory agencies and research review panels often stress  
13 the need for data from a greater number of species (National Academy of Sciences, 2005).  
14 However, with little data on hearing diversity it is unclear how to identify representative groups  
15 or even determine the applicability of such actions.

16 Here, we address how a divergent species of odontocete, the Yangtze finless porpoise  
17 (*Neophocaena asiaeorientalis asiaeorientalis*) receives sound. The Yangtze finless porpoise is a  
18 subspecies of the finless porpoise and the only freshwater porpoise population. They are a  
19 particular conservation issue as they inhabit the same busy waters as the now likely extinct baiji  
20 (*Lipotes vexillifer*) (Turvey et al., 2007). Porpoise populations are also declining rapidly (Mei et  
21 al., 2012; Zhao et al., 2008). Noise impacts on this subspecies are of concern since they inhabit  
22 waters with substantial acoustic sources including shipping, dredging, and underwater  
23 construction. While hearing ranges have been established for this subspecies (Popov et al., 2005),  
24 there are no data regarding how they receive sound. The goal of this work was to examine the  
25 relative sensitivity of the finless porpoise hearing across its head and lower jaw. The results are  
26 then viewed in light of localization capabilities and the potential impacts of anthropogenic noise.

27

## 28 **2. Materials and methods**

29 Hearing measurements were made in April, 2010 on two Yangtze finless porpoises using  
30 auditory evoked potential (AEP) methodology. The AEP technique is increasingly utilized in  
31 marine mammals as a means to rapidly, passively, and non-invasively investigate hearing (rev.

1 Mooney et al., 2012; Nachtigall et al., 2007; Supin et al., 2001). The animal subjects, one male  
2 and one female, were originally from the wild, but have resided at the Institute of Hydrobiology,  
3 Chinese Academy of Sciences, Wuhan, China, for the past 6 and 14 years, respectively. At the  
4 time of the experiments, the adult male (Abao) was estimated to be 15 years old, weighed 47.8  
5 kg, and was 145 cm in length. The female (Ying Ying) weighed 41.8 kg, was 142 cm in length,  
6 and was estimated to be of a similar age. The two were housed in cement pools with four other  
7 conspecifics. Pools were filled with filtered freshwater from the nearby Yangtze River. Hearing  
8 data were first collected from the male over three consecutive days. There was then a three-day  
9 break before data were collected from the female.

10 The basic audiograms of these animals were measured in water several years prior to this  
11 research, (Popov et al., 2005) and probe hearing tests related to this study reflected normal  
12 odontocete hearing capabilities (Mooney et al., 2011). All received sensitivity hearing  
13 examinations were obtained out of the water. The test subject porpoises rested on two foam mats  
14 on the top ledge of a tiered pool. Water was drained just prior to the experiments and the  
15 porpoise within the pool was gently lifted and placed on the mats.

16

### 17 *2.1. Stimulus presentation and evoked potential recording*

18 Once the animal was properly stationed, three custom-built silicone suction cups  
19 (KE1300T, Shin-Etsu, Tokyo, Japan) with embedded gold electrodes (Grass Technologies,  
20 Warwick, RI) were attached using conductive electrode gel (Signagel, Parker Laboratories,  
21 Fairfield, NJ). An active (non-inverting) electrode was placed along the midline of the animal 3-  
22 4 cm behind the blowhole. The reference electrode was placed on the dorsal peduncle, and a  
23 ground electrode was placed on the animal's tail fin. The electrodes were connected to a  
24 biological amplifier (CP511, Grass Technologies) which amplified all responses 10,000 fold and  
25 bandpass filtered them from 300-3000 Hz. This bioamplifier was connected to a BNC breakout  
26 box (2110, National Instruments Corporation, Austin, TX, USA) and a PCMCIA-6062E data  
27 acquisition card implemented in a laptop computer. Using a custom LabView program (National  
28 Instruments), the data acquisition card converted the analog signal to a digital record at a 16 kHz  
29 sampling rate. The data were stored on the laptop.

30 Acoustic stimuli were created using the same custom LabView program, laptop, and data  
31 acquisition card. Outgoing signals were produced at a 512 kHz update rate. Signal amplitudes

1 were controlled using a HP 350D attenuator and projected to the animal through a custom  
2 “jawphone” or suction-cup transducer. This consisted of a Reson 4013 transducer (Slangerup,  
3 Denmark) implanted in a custom-built silicone suction cup. The transducer was attached to the  
4 animal using the electrogel to eliminate reflective air gaps between the cup and the animals’ skin.

5 To measure location-based receiving sensitivity, the suction-cup transducer was attached  
6 at nine specific locations on the animal’s head and body. These were the lower melon, jaw tip,  
7 throat, lower jaw, mandibular fat pad, overlying (outward from) the auditory bulla, meatus, back,  
8 and flipper (Fig 1). The first seven locations were used to map the relative thresholds of the  
9 animal across its head. The back and flipper positions were used as controls. Thresholds were  
10 measured using four different stimuli: broadband clicks centered at 100 kHz (see Mooney et al.,  
11 2011), and sinusoidally amplitude modulated (SAM) tones at carrier frequencies of 8, 54, and  
12 120 kHz. All stimuli were presented in 20 ms bouts at a 20 s<sup>-1</sup> rate. Carrier signals within the  
13 bout were modulated (tones) or presented (clicks) at a rate of 1 kHz. The individual click stimuli  
14 were 20 μs in duration. Evoked response recordings were of 30 ms duration and began  
15 coincident with stimulus presentation. Stimuli were presented 1000 times for each sound level  
16 and a corresponding response was collected for each sound presentation. These 1000 responses  
17 were averaged using the custom software and stored for later data analyses. This total number of  
18 stimuli and sweeps is relatively standard for odontocetes because it establishes a robust response  
19 while averaging down background noise to a relatively low level (Nachtigall et al., 2007). A  
20 record for a particular frequency and sound level is then acquired in 50 s and thresholds are  
21 obtained in just a few minutes.

## 22 23 2.2. *Calibrations and data analysis*

24 Suction-cup transducer stimuli were calibrated in the water at the research facility before  
25 the experiment using the same sounds as in the hearing tests. Received measurements were  
26 made using a Reson 4040 transducer. The projector and receiver were placed 1 m apart at 1 m  
27 depth. The use of the short-duration SAM tone sweeps (i.e., several ms) and relatively low sound  
28 levels (i.e., reflections were significantly attenuated relative to the direct 1 m path) reduced the  
29 interference of overlapping standing waves and facilitated the calibration. The received signals  
30 were viewed on an oscilloscope (Tektronix TPS 2014, Beaverton, OR, USA) and the peak-to-  
31 peak voltages ( $V_{p-p}$ ) were measured. For the SAM tones, this  $V_{p-p}$  was converted to peak-

1 equivalent root-mean square voltage (peRMS) by subtracting 15 dB. The peRMS was taken as  
2 the RMS voltage and used to calculate the sound pressure level (SPL) for that frequency (dB re:  
3 1  $\mu$ Pa). This method is often used for calculating the modulating amplitude of these stimuli,  
4 which are most easily initially quantified by their peak-to-peak values (e.g., Mooney et al., 2010;  
5 Nachtigall et al., 2008; Nachtigall et al., 2005). Sound pressure levels of the clicks were  
6 measured using  $V_{p-p}$  as is standard to measure odontocete click intensities due to the inherent  
7 brevity of the signals (Au, 1993). Hereafter, dB levels of click SPLs are presented in dB<sub>p-p</sub> re: 1  
8  $\mu$ Pa and SAM tone dB are presented in dB<sub>peRMS</sub> re: 1  $\mu$ Pa. While calibration measurements were  
9 in the free- and far-fields, it should be acknowledged that stimuli presented in this manner are  
10 inherently near-field stimuli. Thus, this method provides comparisons to hearing in the free-  
11 field, but with the caveat that there may be differences between free-field and contact transducer  
12 measurements (Cook et al., 2006). Actual hearing differences between methods appears minimal  
13 (Finneran and Houser, 2006).

14 In order to determine the regions of “best” response, two primary variables were  
15 analyzed. The first was the relative threshold of response at the varying positions. The second  
16 was the latency of the AEP responses. For thresholds, SPLs started at an estimated 20-30 dB  
17 above previous audiogram thresholds of the finless porpoise (Popov et al., 2005). With a  
18 detectable stimulus, an envelope following response (EFR) was visible as part of the custom  
19 AEP program. A 16-ms portion of the response was fast-Fourier transformed (FFT; 256 points)  
20 and viewed in the frequency spectrum. The magnitude of the EFR was reflected by a peak in the  
21 FFT at the 1 kHz modulation rate (Supin and Popov, 1995). Sound levels were then decreased in  
22 steps of 5-10 dB until responses (EFRs and FFT peaks) were no longer visually detectable for 2-  
23 3 trials. Each threshold took 5-10 min to collect and 5-10 thresholds were collected per session.  
24 Two sessions were collected per day.

25 Actual threshold estimates were calculated offline. For each of the frequencies and  
26 projecting transducer placements, the FFT peak at each stimulus intensity was a function of the  
27 SPL of the stimulus (Nachtigall et al., 2005). A linear regression addressing the data points  
28 obtained was extrapolated to zero, the hypothetical point where there would be no response to  
29 the stimulus. This zero point had to be extrapolated because the low level of biological electrical  
30 noise always present in the records masks the actual zero point. By estimating the zero response  
31 level it was possible to predict the threshold for each frequency and transducer placement

1 presented to the animal. For AEPs, multiple methods can be used to calculate thresholds  
2 (Finneran et al., 2009; Hall, 2007). This FFT-based method is well- established, rapid, and,  
3 importantly, produces thresholds similar to behavioral techniques (Supin et al., 2001; Szymanski  
4 et al., 1999; Yuen et al., 2005) which are considered a standard for sound detection.

5 Response latencies were measured by establishing the time (ms) between stimulus onset  
6 and the point of maximal change in neuronal firing; thus, latencies were measured as the time  
7 value of positive peak of the first four AEP waves, which were designated as wave I, II, III, and  
8 IV, respectively. These waves were likely the response to the first click or SAM stimulus  
9 (Mooney et al., 2006; Supin et al., 2001). This was confirmed by counting back 20 individual  
10 waves (from 20 individual stimuli) from the last significant AEP wave in the EFR. Latencies  
11 relative to stimulus locations were pooled between animals and calculated using all frequencies.

12 Latencies relative to stimulus amplitude were compared separately. In this case, time  
13 values of waves II-IV peaks were compared to the attenuation from maximum stimulus level.  
14 The maximum stimulus level was considered 0 dB and 0 ms delay. The increase in response  
15 latency was then plotted for each decreasing stimulus level. Wave I (usually of smallest  
16 amplitude) data were not included in these analyses as they were not always detectable at lower  
17 stimulus levels. Data were pooled across frequencies and animals. All analyses were conducted  
18 using Excel, Matlab, and Minitab software. Threshold differences between locations were  
19 evaluated with a repeated measures ANOVA and a Tukey's posthoc test. While the order of  
20 locations measures was random, the repeated measures was used because it assumes there was  
21 perhaps some relationship between the variables (for example, multiple thresholds from one  
22 animal and the tones and clicks were measured at a location during one session).

23

### 24 *2.3 CT measures*

25 Computed tomography (CT) scans were acquired from two finless porpoise specimens  
26 that stranded in the month prior to the hearing test experiments. The animals had been frozen and  
27 were gradually thawed for scanning. For one specimen, only the head was available for imaging.  
28 The specimens were scanned at the Zhongnan Hospital, Wuhan University, on a Siemens  
29 Somatom Sensation 16. Both scans were obtained in the transaxial plane using a spiral protocol  
30 of 120 kV and 118 effective mAS. Images were formatted at 1 mm slice widths and a 512  
31 matrix in bone and soft tissue kernels.



1 Attenuation-based segmentations and 3-D reconstructions were obtained using Siemens  
2 proprietary VRT software. Reconstructions were completed for the skull, mandibles,  
3 tympanoperiotic complex, outer mandibular fat body, and intra-mandibular fat body based on  
4 Hounsfield Unit readings consistent with the characteristic X-ray attenuation values for each of  
5 these tissues. This auto-segmentation procedure was followed by visual inspection of the  
6 segmented fields to correct any contour errors. Dissections of the specimens were performed to  
7 verify the position and dimensions of anatomical structures delineated in the reconstructions.  
8

### 9 **3. Results**

#### 10 *3.1. Relative thresholds*

11 Both animals showed good hearing sensitivities. The mean hearing thresholds for all  
12 frequencies and both animals were lowest and nearly identical at the porpoise jaw tip and  
13 mandibular fat pad (Table 1). Thresholds were similarly low overlying the bulla, at the meatus,  
14 and at the lower jaw. The mean thresholds from all these locations were not significantly  
15 different (Fig 2). The throat location was slightly, but significantly elevated relative to these  
16 locations (one-way ANOVA  $F_{7,58} = 12.34$ ,  $p < 0.001$  and subsequent Tukey's pairwise  
17 comparison). Thresholds acquired from lower melon stimulation were substantially higher ( $> 20$   
18 dB) than the areas of best sensitivity (jaw tip, mandibular fat pad, meatus, and overlying the  
19 bulla). Mean thresholds were highest when the transducer was placed on the animals' backs (a  
20 control location). No responses could be detected when the transducer was placed on the  
21 animals' flippers. Male and female porpoises did not demonstrate substantial differences in their  
22 hearing abilities (Fig 2C).

23 Responses from the individual locations broken down by stimulus frequency show  
24 lowest thresholds when sound entered the mandibular fat pad or jaw tip for all frequencies except  
25 at 8 kHz (Fig 3). Stimulation at the throat location was slightly elevated for most frequencies  
26 and substantially (by 20 dB) for 8 kHz. Lowest thresholds for 8 kHz were found at the side  
27 locations: the meatus, overlying the bulla, and at the mandibular fat pad. For all frequencies  
28 except 120 kHz, stimulation at the lower portion of the melon resulted in substantially higher  
29 hearing thresholds (15-25 dB).

#### 30 *3.2. Relative latencies*

1 Mean response latencies were measured using AEP waves 1-4. The latencies were  
2 generally lowest when transducer stimulation was at the mandibular fat pad and the lower jaw  
3 (Fig. 4). When the transducer was overlying the animals' bullae, values were often similarly  
4 low. Latencies increased slightly using sound presented at the meatus. Throat presented stimuli  
5 tended to have response latencies longer than the most rapid response regions (lower jaw, cheek,  
6 over ear), but on par with, or faster than, meatal stimulation. Relative response latencies  
7 increased with stimuli presented at the jaw tip, lower melon, and back.

8 Response latencies were dependent upon sound levels and tended to increase as sound  
9 levels decreased (Fig. 5 and 6). This was clearly visible with a line drawn between the  
10 respective peak values of waves 2-4. This line shows a clear trend in longer response latencies as  
11 sound levels decreased (Fig 5.) These latencies (or increasing delays) were then plotted relative  
12 to the stimulus level. The maximum sound level presented was deemed 0 dB attenuation and 0  
13 ms time delay. The difference in time from those of the original peak values were plotted for  
14 each attenuation step (5, 10, 15 or 20 dB). This was done for waves 2-4. While the spread is  
15 relatively high, there was a significant positive relationship between the increasing sound  
16 attenuation and increasing physiological AEP delays ( $r^2 = 0.21$ ;  $p < 0.05$ ). In other words, as  
17 sound levels decreased, physiological delays increased. This was true across all stimulus  
18 locations and for both animals.

### 19 20 3.3. AEP comparisons to anatomy

21 The sensitivities from the transducer placements were plotted over the scans and three-  
22 dimensional reconstructions of the heads of the scanned stranded postmortem specimens (Fig 7,  
23 8). This provided an anatomical relationship for the physiological measurements. In part  
24 because of the condition of the stranded specimens, the blubber layers in some areas had similar  
25 attenuations to the mandibular fats, which led to some "fogging" of the fat bodies in  
26 autosegmentations. The main jaw fat bodies were distinct but exact edges and dimensions were  
27 uncertain because of this overlap. The combined data from CT assessments and dissections (Fig  
28 8A) revealed three fatty regions distinct from blubber : the melon and bilaterally, an  
29 intramandibular, and a lateral ovoid pad overlying the thin pan bone region of each lower jaw.

30 The mandibular placement, which provided lowest click thresholds (greatest sensitivity),  
31 overlaid the fat body at the pan bone area. The lower jaw location was just adjacent to this fat

1 region. The location overlaying the bulla was also neighboring these tissues as shown in the  
2 VRT visualizations of the acoustics fats of the mandible. Jaw tip and meatus did not appear  
3 directly associated with visualized acoustic fat regions. However, the meatus location produced  
4 the lowest thresholds for the 8 kHz tone. The throat location was near, but not directly  
5 overlying, the anterior portions of the mandibular fats, particularly the intramandibular fat  
6 bodies. The lower melon placement was near the fat of the melon body, but hearing thresholds  
7 were not particularly sensitive from this location.

## 10 **4. Discussion**

### 11 *4.1. Relative hearing*

12 The best responses for the higher frequencies (54, 120 kHz tones, and click) were found  
13 with stimulation towards the front of the head and at the mandibular fat pad location. The lower  
14 frequency, 8 kHz, was detected best using lateral, meatal presented stimuli. While these data  
15 may not conclusively support a double acoustic window for the finless porpoise, they do indicate  
16 these porpoises hear low frequencies better from the side and higher frequencies better at anterior  
17 positions; and at least suggest the need for further investigations. Such a double-acoustic window  
18 has been proposed the bottlenose dolphin (Popov et al., 2008). The porpoise's frequency-  
19 dependent general regions of low and high frequency sensitivity are less specific than the  
20 bottlenose dolphin which shows considerable (near 40 dB) differences across the head (Møhl et  
21 al., 1999). A double acoustic window is intriguing for porpoises as they are considered to  
22 mainly produce high frequency echolocation sounds (Au et al., 1999; Li et al., 2005) which  
23 would be heard best from the front. Dolphins, on the other hand, produce a range of sounds  
24 including lower frequency whistles and hear lower frequencies well from the side presumably for  
25 evaluating whistle directionality (Lammers and Au, 2003; Popov et al., 2008). Yet, for  
26 porpoises, the ambient environment is filled with potentially important low frequency  
27 soundscape cues, and neonate finless porpoises also produce low frequency sounds (Li et al.,  
28 2008). Lateral low frequency hearing may facilitate localization of these sounds and orientation  
29 within the local soundscape.

30 Examining relative sensitivities based on frequency does reflect some data scatter,  
31 although the broadband clicks showed less threshold fluctuation across most of the head (except

1 from the melon site which did not conduct sounds well) (Fig. 3,7,8). These clicks generated  
2 elevated thresholds compared to the tones, which is expected for brief signals and considering  
3 the difference between signals presented in  $\text{dB}_{\text{p-p}}$  (clicks) and those of the tones presented in  
4  $\text{dB}_{\text{rms}}$  (Au et al., 2002). If the tones were compared in  $\text{dB}_{\text{p-p}}$ , this difference in thresholds was  
5 negligible. The generally higher thresholds for melon stimulation probably reflect its acoustic  
6 isolation from the auditory system. Interestingly, the 120 kHz threshold at the melon was least  
7 elevated relative to the other frequencies. The 120 kHz tone was near the center frequency of  
8 porpoise echolocation signals (Li et al., 2005). This suggests a potential means to hear their own  
9 clicks or echoes, but in an attenuated manner. Thresholds from throat stimuli were also elevated,  
10 suggesting that despite predictions in other odontocetes (Cranford et al., 2008), this is not a  
11 preferential auditory pathway for the finless porpoise.

12         Lowest thresholds were found at the mandibular fat pad and lower jaw which reinforce  
13 sprevious hypotheses suggesting acoustic fats preferentially conduct sound to the ear (Bullock et  
14 al., 1968; Norris, 1968). The lower jaw of these porpoises has limited extramandibular fat  
15 suggesting that, like in dolphins, sound is either conducted to the adjacent fat body or is  
16 transmitted through the pan bone to the intramandibular fat and then to the ear as Norris also  
17 proposed investigating. How sound could be effectively transmitted through the impedance  
18 mismatch of bone is uncertain.

19         The responses and sensitivities from locations that are not associated with acoustic fats  
20 were particularly striking (Fig 8). This includes the jaw tip, throat, the meatus and overlying the  
21 bulla. Responses were even generated from the animals' back. Hearing from the back is quite  
22 unusual and simply reflects that sound is transmitted through the body's tissues. Similar  
23 empirical (Møhl et al., 1999; Mooney et al., 2008) and modeling (Cranford et al., 2008) studies  
24 have suggested good hearing from head pathways not necessarily associated with acoustic fat.  
25 One concern here is using a suction-cup transducer may have generated responses through means  
26 not considered primary odontocete auditory mechanisms (e.g, bone conduction). Yet, soft tissue  
27 pathways offer the most parsimonious entryway into the bulla (Cranford et al., 2010). Further,  
28 prior work has shown using a suction-cup transducer produces thresholds that are similar to free-  
29 field stimuli suggesting a consistent hearing mechanism between the two methods (Finneran and  
30 Houser, 2006). This method also provides consistent stimuli at a fixed difference which is vital  
31 in near-field experiments (Kalmijn, 1988). In water, sounds are more often received by

1 porpoises in a free-field plane wave across the head and body. Sound reception and conduction  
2 to the ear may be influenced by the subtle differences in preferential acoustic pathways. These  
3 small differences likely play a large role in sound processing and properly utilizing acoustic  
4 signals.

5 While hearing thresholds were primarily lowest at the jaw tip, it is likely that sound  
6 presented at this location influenced responses by sound accessing both ears. The same is  
7 probably true for the throat measurements. In both situations the transducer was placed on the  
8 midline. Similar low “midline” thresholds have been shown in the beluga and the bottlenose  
9 dolphin (Møhl et al., 1999; Mooney et al., 2008). Sound reaching both ears likely increases  
10 evoked response amplitudes relative to ipsilateral stimulations and thresholds were  
11 comparatively low. Sounds presented from locations on the side of the head (lower jaw to the  
12 ear) were likely received primarily by the ipsilateral ear. (They also may have been shaded on  
13 the contra-lateral side, although these differences were not measured.) Because minimum  
14 thresholds were from ipsilateral locations of the mandibular fat pad and overlying the porpoise  
15 bulla, this suggests that these were particularly sensitive locations.

16 Yet, mean thresholds were not substantially different at locations from the jaw tip to the  
17 ear (~12 dB), suggesting that the porpoise receives sound similarly from multiple locations and  
18 sensitivity cues may be quite subtle for the finless porpoise. The slight differences in thresholds  
19 across the finless porpoise head suggest a broad receiving beam and directivity index. If so, this  
20 would be similar to the harbor porpoise’s (*Phocoena phocoena*) auditory receiving angles  
21 (Kastelein et al., 2005), and may reflect conserved auditory similarities (e.g., Popov et al., 2006)  
22 despite the substantial niche separations. The relative similarity of sensitivities across the finless  
23 porpoise head are quite different from that of the bottlenose dolphin and beluga whale, for which  
24 30-40 dB differences were found across the animals’ heads (Møhl et al., 1999; Mooney et al.,  
25 2008). This suggests that while there are consistencies in lower jaw hearing, substantial  
26 differences can be found in how divergent odontocetes receive sound.

27 Differences may be due to niche separations. For one, bottlenose dolphins probably use  
28 long-range echolocation compared to a river porpoise (the river may restrict ranges). Coastal  
29 porpoises may not need a high directivity index if their sonar is range limited by the riverine  
30 environment. In general, these difference are not very surprising when considering that porpoises  
31 are quite phylogenetically divergent from other odontocetes, and finless porpoises themselves are

1 even farther removed (5.60–11.60 million years) (McGowen et al., 2009). Determining whether  
2 these differences result from species morphology, simple size differences, or other factors,  
3 requires further investigation.

4 With over 70 species in varying aquatic niches (Perrin et al., 2009), finding auditory  
5 differences among divergent odontocete species is expected. In addition, factors other than  
6 hearing also influence jaw morphology. Yet, as the shape and size of a receiver contributes  
7 substantially to transducer performance (Au and Hastings, 2009), complex mandibular anatomy  
8 seemingly plays a major role in how sounds are gathered and utilized by the auditory system.  
9 This is reflected in variations in received sensitivity. These results seem to suggest that with  
10 species anatomical differences, there are correlates of divergent auditory capabilities.

11 Signal-to-noise ratios may be low for finless porpoises because they receive sound well at  
12 multiple locations. They may be sensitive to a greater proportion of both biologically important  
13 sounds and confounding signals. Sounds at off-the-midline axis angles may not be substantially  
14 shaded. This may aid in detecting low-amplitude biologically important cues. In a high-noise  
15 environment, such as the Yangtze River, detecting important certain signals from noise may be  
16 difficult for the finless porpoise. While high-frequency echolocation signals may not masked by  
17 most noise, detection of lower-frequency communication signals, and the sounds of certain fish  
18 prey (Li et al., 2008; Luczkovich et al., 2000), may be affected by a lower signal-to-noise ratios.

#### 19 20 *4.2. Relative latencies*

21 Response latencies varied according to stimulus location and relative distance to the ear.  
22 The greatest latencies were found when stimuli were presented farther from the ear, at the  
23 animals' back and at the lower melon. Minimum response latencies were found at the animals'  
24 lower jaw and mandibular fat pad locations. These were not the shortest routes to the ear,  
25 suggesting sound pathways which may be lowest in impedance and preferential for sound  
26 conduction. These data agree with sound speed measurements collected from deceased  
27 odontocetes (Norris and Harvey, 1974).

28 Latencies might also reflect the orientation of sound entering the bulla. In this manner, a  
29 plane wave is not entirely dissipated by its reception and conduction from multiple points on the  
30 head. Rather, sound received at different locations could be summated in time. For example, low  
31 amplitude returning echoes (which are effectively a plane wave) would be difficult to detect if

1 received as a point source. But a plane wave, which doesn't reach all parts of the head at the  
2 same time, might be effectively enhanced by anatomically-induced latencies guiding the plane  
3 wave across the head, i.e., anatomy may help coordinate sound to the bulla, increasing the  
4 physiological responses to sound. This may be advantageous for detecting short duration, low  
5 amplitude sounds, such as echolocation echoes, but disadvantageous to intense impulse sounds,  
6 such as some anthropogenic sources.

7         There was a slight increase in response latency with decreasing sound level (Fig. 5 and  
8 6). Such findings have been established in terrestrial mammals as well as in other odontocetes  
9 (Don et al., 1984; Popov et al., 2008). We see from prior work that sound levels are directly tied  
10 to response magnitude, and this magnitude is linked to response latency (Popov et al., 2008).  
11 Because sound levels will often be different at ipsi- and contralateral ears, results imply that  
12 sound levels can affect responses for sound source localization in two manners: by response  
13 amplitudes and latency. A sound from the one side, for this example the right, would likely be  
14 higher in amplitude at the right ear. Thus, physiological response amplitudes in the right ear are  
15 higher, but also faster, compared to lower amplitude sounds on the left (contra-lateral) side of the  
16 head. These physiological mechanism may be in part adaptations to sound speed in water (~ 5x  
17 faster than in air), compensating for the minimal intra-aural time and loudness differences of an  
18 aquatic medium (Mooney et al., 2012; Moore et al., 1995). Thus, finless porpoises, and likely  
19 other odontocetes, have multiple means to direct and shade sound within the head.

20         These differences in latencies are small but their description in multiple animals and  
21 distinct odontocete species suggest that they are robust. Notably, odontocetes have rapid  
22 integration times, perhaps in part to help discriminate these acoustic differences (Au et al., 1988),  
23 as these differences in latencies may also provide clues to sound reception. The decreased  
24 latencies and increased response amplitudes of preferential sound pathways may play an  
25 important role in use of sound. Conversely, sounds received at other locations may be somewhat  
26 limited by decreased response amplitudes and increased latencies. Comparative form and  
27 function investigations in other species will address the differences and consistencies that  
28 comprise odontocete auditory systems.

29         The differences in relative hearing sensitivities between the finless porpoise and the  
30 bottlenose dolphin and beluga hearing data indicate that additional auditory variations are likely  
31 to be found among taxonomic groups. This consideration underscores the need for care when

1 applying hearing data from representative animals to divergent species. These differences also  
2 suggest that species may differ not only based upon audiograms, but in more subtle auditory  
3 adaptations. Thus, multiple auditory characteristics (e.g., audiograms, temporal resolution,  
4 received sensitivity parameters, filter shapes, and form-function studies) will better inform  
5 comparisons between species and potential applications of hearing studies.

## 7 **List of abbreviations**

8 AEP – auditory evoked potential

9 CT – computed tomography

10 EFR – envelope following response

11 FFT – fast-Fourier transform

12 MRI – magnetic resonance image

13 peRMS – peak-equivalent root-mean square

14 SAM – sinusoidally amplitude modulated

15 SPL – sound pressure level

16  $V_{p-p}$  – peak-to-peak voltages

## 19 **Acknowledgements**

20 The authors would like to express their gratitude to the staff and students at the Baiji Aquarium,  
21 Institute of Hydrobiology, for their support and assistance in data collection. We also thank  
22 Alexander Supin and Paul Nachtigall for consultation and providing the AEP software. The  
23 inspiration for this research stems from many discussions with Manolo Castellote and Aude  
24 Pacini. The work was funded by the Office of Naval Research, a Mellon Joint Initiatives Award,  
25 the Knowledge Innovation Program of Chinese Academy of Sciences (KSCX2-EW-Z-4), the  
26 National Natural Science Foundation of China (No. 31170501), and we thank them for their  
27 support. This study was conducted with the approval of the Institute of Hydrobiology of the  
28 Chinese Academy of Sciences and the Woods Hole Oceanographic Institution’s Animal Care  
29 and Utilization Committee (protocol number DRK #3).



1 **References**

- 2 **Angell, J. R. and Fite, W.** (1901). The monaural localization of sound. *Psychol. Rev.* **8**, 225-  
3 246.
- 4 **Au, W. W. L. and Hastings, M. C.** (2009). Principles of marine bioacoustics. New York:  
5 Springer.
- 6 **Au, W. W. L., Kastelein, R. A., Rippe, H. T. and Schooneman, N. M.** (1999). Transmission  
7 beam pattern and echolocation signals of a harbor porpoise (*Phocoena phocoena*). *J.*  
8 *Acoust. Soc. Am.* **106**, 3699-3705.
- 9 **Au, W. W. L., Lemonds, D. W., Vlachos, S., Nachtigall, P. E. and Roitblat, H. L.** (2002).  
10 Atlantic bottlenose dolphin (*Tursiops truncatus*) hearing thresholds for brief broadband  
11 signals. *J. Comp. Psychol.* **116**, 151-157.
- 12 **Au, W. W. L., Moore, P. W. B. and Pawloski, D. A.** (1988). Detection of complex echoes in  
13 noise by an echolocating dolphin. *J. Acoust. Soc. Am.* **83**, 662-668.
- 14 **Brill, R. L., Sevenich, M. L., Sullivan, T. J., Sustman, J. D. and Witt, R. E.** (1989).  
15 Behavioral evidence for hearing through the lower jaw by an echolocating dolphin  
16 (*Tursiops truncatus*). *Mar. Mamm. Sci.* **4**, 223–230.
- 17 **Bullock, T. H., Grinnell, A. D., Ikezono, F., Kameda, K., Katsuki, Y., Nomoto, M., Sato, O.,**  
18 **Suga, N. and Yanagisava, K.** (1968). Electrophysiological studies of the central auditory  
19 mechanisms in cetaceans. *Z. Vergl. Physiol.* **59**, 117-156.
- 20 **Cook, M. L. H., Verela, R. A., Goldstein, J. D., McCulloch, S. D., Bossart, G. D., Finneran,**  
21 **J. J., Houser, D. S. and Mann, D. A.** (2006). Beaked whale auditory evoked potential  
22 hearing measurements. *J. Comp. Physiol. A.* **192**, 489-495.
- 23 **Cranford, T. W., Krysl, P. and Amundin, M.** (2010). A New Acoustic Portal into the  
24 Odontocete Ear and Vibrational Analysis of the Tympanoperiotic Complex. *PLoS One* **5**,  
25 e11927.
- 26 **Cranford, T. W., Krysl, P. and Hildebrand, J. A.** (2008). Acoustic pathways revealed:  
27 simulated sound transmission and reception in Cuvier's beaked whale (*Ziphius*  
28 *cavirostris*). *Bioinspir. Biomimet.* **3**, 1-10.
- 29 **Don, M., Elberling, C. and Waring, M.** (1984). Objective detection of averaged auditory  
30 brainstem responses. *Scand. Audiol.* **13**, 219-228.

- 1 **Finneran, J. J. and Houser, D. S.** (2006). Comparison of in-air evoked potential and  
2 underwater behavioral hearing thresholds in four bottlenose dolphins (*Tursiops*  
3 *truncatus*). *J. Acoust. Soc. Am.* **119**, 3181-3192.
- 4 **Finneran, J. J., Houser, D. S., Mase-Guthrie, B., Ewing, R. Y. and Lingenfelter, R. G.**  
5 (2009). Auditory evoked potentials in a stranded Gervais' beaked whale  
6 (*Mesoplodon europaeus*). *J. Acoust. Soc. Am.* **126**, 484–490.
- 7 **Hall, J. W.** (2007). The new handbook of auditory evoked potentials. Boston: Pearson  
8 Education.
- 9 **Heffner, R. S. and Heffner, H. E.** (1992). Evolution of sound localization in mammals. In *The*  
10 *evolutionary biology of hearing*. (ed. D. B. Webster, R. R. Fay and A. N. Popper), pp.  
11 691-715. New York: Springer-Verlag.
- 12 **Kalmijn, A. D.** (1988). Acoustic and hydrodynamic field detection. In *Sensory biology of*  
13 *aquatic animals*. (ed. J. Atema, R. R. Fay, A. N. Popper and W. N. Tavolga), pp. 83-131.  
14 New York: Springer-Verlag.
- 15 **Kastelein, R. A., Janssen, M., Verboom, W. C. and de Haan, D.** (2005). Receiving beam  
16 patterns in the horizontal plane of a harbor porpoise (*Phocoena phocoena*). *J. Acoust.*  
17 *Soc. Am.* **118**, 1172-1179.
- 18 **Ketten, D. R.** (1994). Functional analyses of whale ears: Adaptations for underwater hearing.  
19 *I.E.E.E Underwater Acoustics* **1**, 264 - 270.
- 20 **Koopman, H. N., Budge, S. M., Ketten, D. R. and Iverson, S.** (2006). Topographic  
21 distribution of lipids inside the mandibular fat bodies of odontocetes: Remarkable  
22 complexity and consistency. *IEEE. J. Oceanic. Eng.* **31**, 95-106.
- 23 **Koopman, H. N. and Zahorodny, Z. P.** (2008). Life history constains biochemical  
24 development in the highly specialized odontocete echolocation system. *Proc. R. Soc.*  
25 *Lond. B. Biol. Sci.* **275**, 2327-2334.
- 26 **Lammers, M. O. and Au, W. W. L.** (2003). Directionality in the Whistles of Hawaiian Spinner  
27 Dolphins (*Stenella Longirostris*): A Signal Feature to cue Direction of Movement. *Mar.*  
28 *Mamm. Sci.* **19**, 249-264.
- 29 **Li, S., Wang, K., Wang, D. and Akamatsu, T.** (2005). Echolocation signals of the free-ranging  
30 Yangtze finless porpoise (*Neophocaena phocaenoides asiaeorientalis*). *J. Acoust. Soc.*  
31 *Am.* **117**, 3288-3296.

- 1 **Li, S., Wang, K., Wang, D., Dong, S. and Akamatsu, T.** (2008). Simultaneous production of  
2 low- and high-frequency sounds by neonatal finless porpoises (L). *J. Acoust. Soc. Am.*  
3 **124** , 716–718.
- 4 **Luczkovich, J. J., Daniel, H. J., III, Hutchinson, M., Jenkins, T., Johnson, S. E., Pullinger,**  
5 **R. C. and Sprague, M. W.** (2000). Sounds of sex and death in the sea: bottlenose  
6 dolphin whistles suppress mating choruses of silver perch. *Bioacoustics* **10**, 323-334.
- 7 **McCormick, J. G., Wever, E. G., Palin, J. and Ridgeway, S. H.** (1970). Sound conduction in  
8 the dolphin ear. *J. Acoust. Soc. Am.* **48**, 1418-1428.
- 9 **McGowen, M. R., Spaulding, M. and Gatesy, J.** (2009). Divergence date estimation and a  
10 comprehensive molecular tree of extant cetaceans. *Mol. Phylogenet. Evol.* **53** 891-906.
- 11 **Mei, Z., Huang, S. L., Y., H., Turvey, S. T., W., G. and Wang, D.** (2012). Accelerating  
12 population decline of Yangtze finless porpoise ( *Neophocaena asiaeorientalis*  
13 *asiaeorientalis*). *Biol. Conserv.* **153**, 192-200.
- 14 **Møhl, B., Au, W. W. L., Pawloski, J. L. and Nachtigall, P. E.** (1999). Dolphin hearing:  
15 relative sensitivity as a function of point of application of a contact sound source in the  
16 jaw and head region. *J. Acoust. Soc. Am.* **105**, 3421-3424.
- 17 **Mooney, T. A., Lee, W.-J. and Hanlon, R. T.** (2010). Long-term squid anesthesia using  
18 magnesium chloride. *Mar. Freshw. Behav. Phy.* **in press**.
- 19 **Mooney, T. A., Li, S., Ketten, D. R., Wang, K. and Wang, D.** (2011). Auditory temporal  
20 resolution and evoked responses to pulsed sounds for the Yangtze finless porpoises  
21 (*Neophocaena phocaenoides asiaeorientalis*). *J. Comp. Physiol., A* **in press**.
- 22 **Mooney, T. A., Nachtigall, P. E., Castellote, M., Taylor, K. A., Pacini, A. F. and Esteban, J.-**  
23 **A.** (2008). Hearing pathways and directional sensitivity of the beluga whale,  
24 *Delphinapterus leucas*. *J Exp Mar Biol Ecol* **362**, 108–116.
- 25 **Mooney, T. A., Nachtigall, P. E. and Yuen, M. M. L.** (2006). Temporal resolution of the  
26 Risso’s dolphin, *Grampus griseus*, auditory system. *J. Comp. Physiol. A.* **192** 373-380.
- 27 **Mooney, T. A., Yamato, M. and Branstetter, B. K.** (2012). Hearing in cetaceans: From natural  
28 history to experimental biology. *Advances in Marine Biology* **63**, 197-246.
- 29 **Moore, P. W. B., Pawloski, D. A. and Dankiewicz, L.** (1995). Interaural time and intensity  
30 difference thresholds in the bottlenose dolphin (*Tursiops truncatus*). In *Sensory Systems*

- 1           of *Aquatic Mammals*. (ed. R. A. Kastelein, J. A. Thomas and P. E. Nachtigall). Woerden,  
2           The Netherlands: De Spil Publishers.
- 3 **Müller, R.** (2004). A numerical study of the role of the tragus in the big brown bat. *J. Acoust.*  
4           *Soc. Am.* **116**, 3701-3712.
- 5 **Nachtigall, P. E., Mooney, T. A., Taylor, K. A., Miller, L. A., Rasmussen, M., Akamatsu, T.,**  
6           **Teilmann, J., Linnenschidt, M. and Vikingsson, G. A.** (2008). Shipboard  
7           measurements of the hearing of the white-beaked dolphin, *Lagenorhynchus albirostris*. *J.*  
8           *Exp. Biol.* **211**, 642-647.
- 9 **Nachtigall, P. E., Mooney, T. A., Taylor, K. A. and Yuen, M. M. L.** (2007). Hearing and  
10          auditory evoked potential methods applied to odontocete cetaceans. *Aquat. Mamm.* **33**, 6-  
11          13.
- 12 **Nachtigall, P. E., Yuen, M. M. L., Mooney, T. A. and Taylor, K. A.** (2005). Hearing  
13          measurements from a stranded infant Risso's dolphin, *Grampus griseus*. *J. Exp. Biol.* **208**,  
14          4181-4188.
- 15 **National Academy of Sciences.** (2005). Marine mammal populations and ocean noise:  
16          Determining when noise causes biologically significant effects. Washington, DC:  
17          National Academies Press.
- 18 **Norris, K. S.** (1968). The evolution of acoustic mechanisms in odontocete cetaceans. In  
19          *Evolution and environment*. (ed. E. T. Drake), pp. 297-324. New York: Yale University  
20          Press.
- 21 **Norris, K. S. and Harvey, G. W.** (1974). Sound transmission in the porpoise head. *J. Acoust.*  
22          *Soc. Am.* **56**, 659-664.
- 23 **Perrin, W. F., Würsig, B. and Thewissen, J. G. M.** (2009). Encyclopedia of marine mammals  
24          New York: Academic Press.
- 25 **Popov, V. V., Supin, A. Y., Klishin, V. O., Tarakanov, M. B. and Plentenko, M. G.** (2008).  
26          Evidence for double acoustic windows in the dolphin, *Tursiops truncatus*. *J. Acoust. Soc.*  
27          *Am.* **123**, 552-560.
- 28 **Popov, V. V., Supin, A. Y., Wang, D. and Wang, K.** (2006). Nonconstant quality of auditory  
29          filters in the porpoises, *Phocoena phocoena*, and *Neophocaena phocaenoides* (Cetacea,  
30          Phocoenidae). *J. Acoust. Soc. Am.* **119**, 3173-3180.

- 1 **Popov, V. V., Supin, A. Y., Wang, D., Wang, K., Xiao, J. and Li, S.** (2005). Evoked-potential  
2 audiogram of the Yangtze finless porpoise *Neophocaena phocaenoides asiaorientalis*  
3 (L). *J. Acoust. Soc. Am.* **117**, 2728-2731.
- 4 **Roffler, S. and Butler, R. A.** (1967). Factors that influence the localization of sound in the  
5 vertical plane. *J. Acoust. Soc. Am.* **43**, 1255-1259.
- 6 **Supin, A. Y. and Popov, V. V.** (1995). Envelope-following response and modulation rate  
7 transfer function in the dolphin's auditory system. *Hear. Res.* **92**, 38-45.
- 8 **Supin, A. Y., Popov, V. V. and Mass, A. M.** (2001). The sensory physiology of aquatic  
9 mammals. Boston: Kluwer Academic Publishers.
- 10 **Szymanski, M. D., Bain, D. E., Kiehl, K., Pennington, S., Wong, S. and Henry, K. R.** (1999).  
11 Killer whale (*Orcinus orca*) hearing: Auditory brainstem response and behavioral  
12 audiograms. *J. Acoust. Soc. Am.* **106**, 1134-1141.
- 13 **Turvey, S. T., Pitman, R. L., Taylor, B., Barlow, J., Akamatsu, T., Barrett, L. A., Zhao, X.,**  
14 **Reeves, R. R., Stewart, B. S., Wang, K. et al.** (2007). First human-caused extinction of  
15 a cetacean species? *Biol. Lett.-(UK)* **3**, 537-540.
- 16 **Varansi, U. and Malins, D. C.** (1972). Triacylglycerols characteristics of porpoise acoustic  
17 tissues: Molecular structures of diisovaleroylglycerides. *Science* **176**, 926-928.
- 18 **Yuen, M. M. L., Nachtigall, P. E., Breese, M. and Supin, A. Y.** (2005). Behavioral and  
19 auditory evoked potential audiograms of a false killer whale (*Pseudorca crassidens*). *J.*  
20 *Acoust. Soc. Am.* **118**, 2688-2695.
- 21 **Zhao, X., Barlow, J., Taylor, B. L., Pitman, R. L., Wang, K., Wei, Z., Stewart, B. S.,**  
22 **Turvey, S. T., Akamatsu, T., Reeves, R. R. et al.** (2008). Abundance and conservation  
23 status of the Yangtze finless porpoise in the Yangtze River, China. *Biol. Conserv.* **141**,  
24 3006-3018.
- 25  
26

1 Table 1. Thresholds in dB for both animals provided by individual stimulus frequencies  
 2 and the mean of all thresholds, relative to the location of the suction-cup-transducer-  
 3 presented stimuli.  
 4

|                 |   | Mean (s.d.)    | Click       | 120         | 54          | 8           |
|-----------------|---|----------------|-------------|-------------|-------------|-------------|
| Lower melon     | 1 | 76.8 (12.2)    | 82.3        | 61.9        | 86.3        | no response |
| Jaw tip         | 2 | 55.4 (8.9) #   | 65.3        | 50.9        | 49.0        | 56.5        |
| Throat          | 3 | 67.0 (12.3)    | 70.4        | 62.0        | 59.5        | 76.4        |
| Lower jaw       | 4 | 61.1 (6.6)     | 68.5        | 56.7        | 60.3        | 58.8        |
| Mandib fat pad  | 5 | 55.7 (9.8) #   | 65.7        | 53.7        | 42.5        | 61.0        |
| Meatus          | 6 | 59.3 (8.1) #   | 70.2        | 59.1        | 53.3        | 54.6        |
| Overlying bulla | 7 | 57.7 (8.9) #   | 68.3        | 54.8        | 49.0        | 58.7        |
| Back            | 8 | 97.0 (11.2) *# | 99.1        | 85.4        | 107.6       | no response |
| Flipper         | 9 | no response    | no response | no response | no response | no response |

5  
 6 \*Thresholds from stimuli presented at the back are significantly greater than all others;

7 #Thresholds from stimuli presented at lower melon are different from those with the ‘pound’  
 8 symbol (one-way ANOVA  $F_{7,58} = 12.34$ ,  $p < 0.001$  and subsequent Tukey’s pairwise comparison)

9  
 10  
 11

1 Figure legends

2

3 Figure 1. Finless porpoise (*Neophocoena phocoena asiaeorientalis*) from side (A) and front (B)  
4 viewpoints. Stimulus locations are indicated by the numbered circles. 1, Lower melon; 2, jaw  
5 tip; 3, throat; 4, lower jaw; 5, mandibular fat pad; 6, overlying the auditory bulla; 7, meatus; 8,  
6 back; 9, flipper.

7

8 Figure 2. Thresholds to all suction-cup transducer presented stimuli from both animals. (A)  
9 Boxplots of those thresholds showing mean value (dot), median and  $\pm 25\%$  (shown by box), and  
10  $\pm 50\%$  shown by whiskers. (B) Mean  $\pm 1$  s.d. of the thresholds. No response was detected from  
11 stimuli presented at the control flipper location. \* indicates the back location had significantly  
12 higher threshold values than all other locations (one-way ANOVA  $F_{7,58} = 12.34$ ,  $p < 0.001$  and  
13 subsequent Tukey's pairwise comparison). # indicates thresholds from stimuli at the lower  
14 melon were significantly different relative to the jaw tip, mandibular fat pad, meatus, overlying  
15 the bulla, and back. (C) Thresholds comparison of the male (black) and female (grey) porpoises.

16

17 Figure 3. Mean thresholds of both animals by stimulus frequency at respective stimulus  
18 locations, excluding data from the back. No response was detected from sounds presented at the  
19 flipper and those data were not plotted.

20

21 Figure 4. (A) AEP waveform to a click stimulus presented at the 'lower jaw' location at 135 dB  
22 p-p. The first four 'positive' inflections of the first click are indicated. (B) Latencies of the four  
23 waves from all stimulus locations with a detectable response. The respective waves (I, II, III,  
24 IV) are labeled to the right.

25

26 Figure 5. (A) AEP responses to a 100 kHz centered click at 105, 95, 85, 80, and 75 dB p-p. (B)  
27 Close-up of the AEP waveforms illustrated by the inset box in (A). Regressions of the peak  
28 positive waves III and IV are overlaid. Note the regressions slope towards increasing delays for  
29 corresponding peak values.

30

1 Figure 6. Delay of waves II, III, and IV relative to stimulus attenuation (dB). Response delays  
2 increase with decreasing sensation levels, indicated by the regression. All stimulus frequencies  
3 are combined. Red circle = wave II, green square = wave III, blue triangle = wave IV.  
4

5 Figure 7. Computed tomography topograms of both specimens showing the head, bone and body  
6 structure. Circles reflect the sound levels (in dB) of the relative thresholds where zero was the  
7 lowest threshold. Greater numbers reflect the relatively higher thresholds; NR indicates no  
8 response was measured. (A) and (B) reflect high-frequency click thresholds. (C) and (D) are  
9 from the 8 kHz amplitude modulated tone. (A,C) and (B,D) are specimens 1 and 2 respectively.  
10

11 Figure 8. Three-dimensional reconstruction of the CT images White is bone, green are fat bodies.  
12 Circles reflect the sound levels (in dB) of the relative thresholds where zero was the lowest  
13 threshold. A-C show relative threshold values for the broadband clicks. D-F show values for the  
14 8 kHz tone. Side, bottom and off-axis views are presented for these frequencies.  
15



Figure 1.

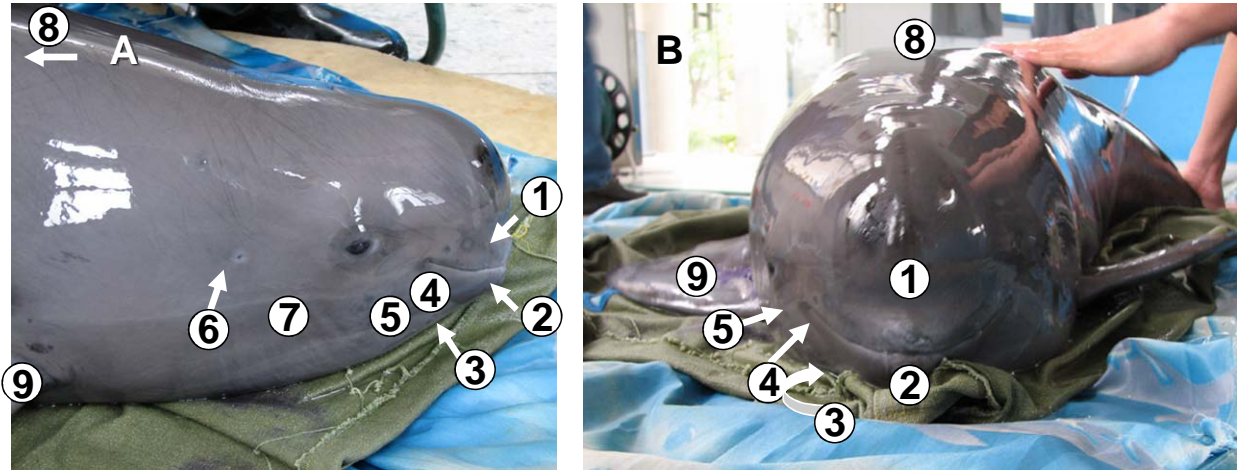

Figure 2.

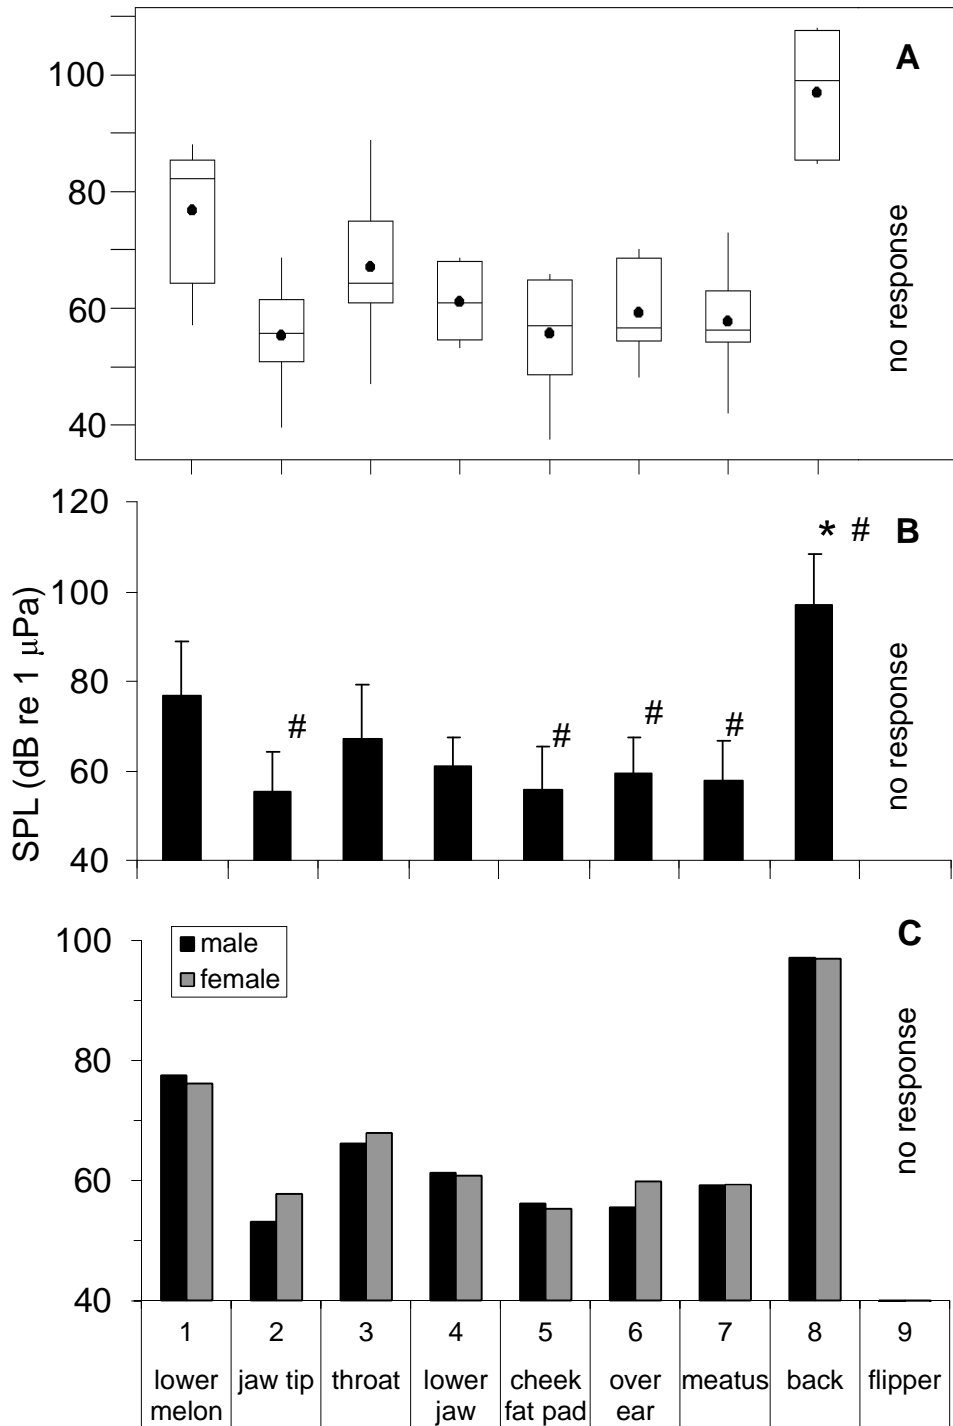

Figure 3.

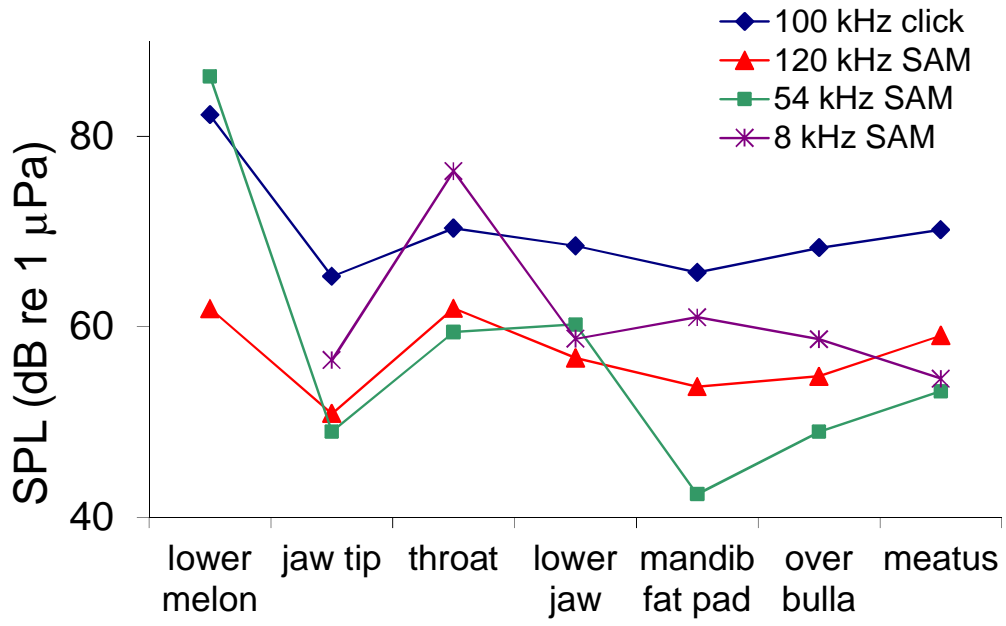

Figure 4.

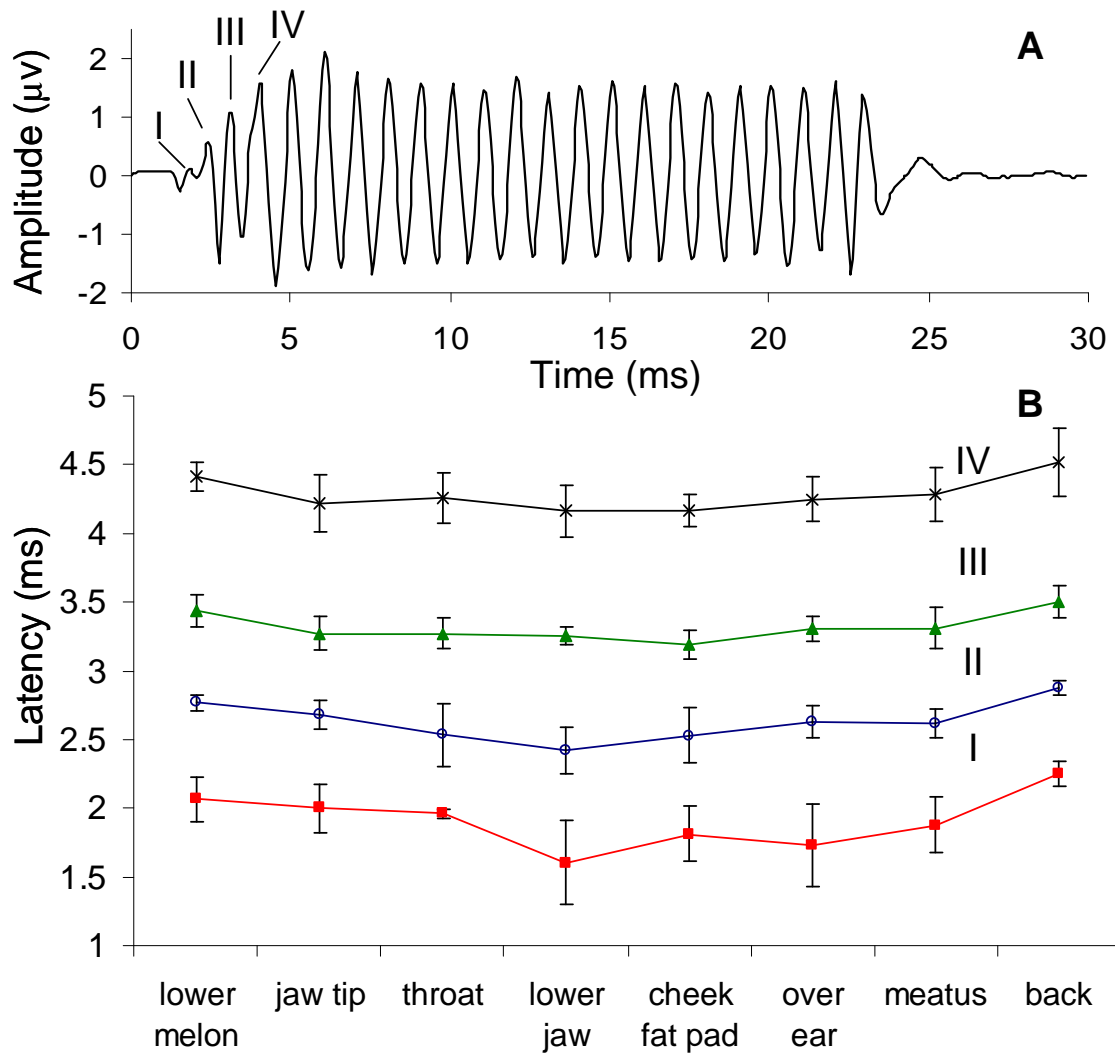

Figure 5.

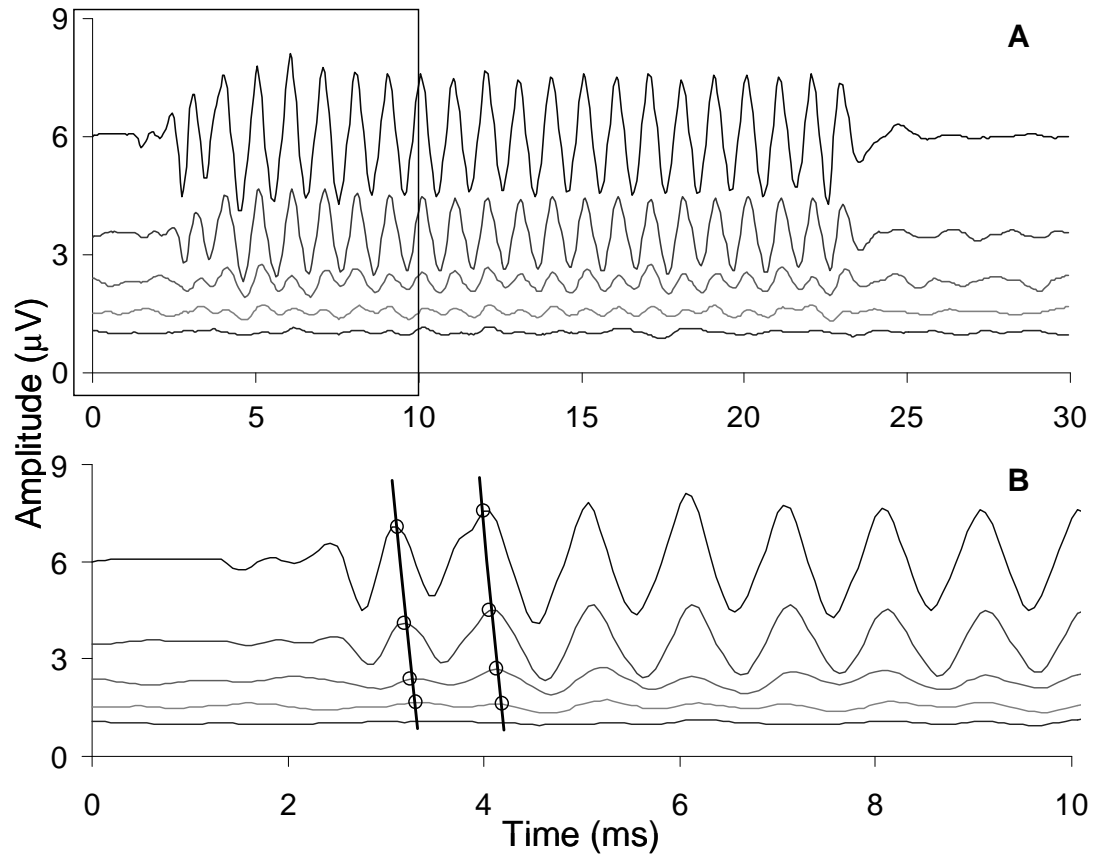

Figure 6.

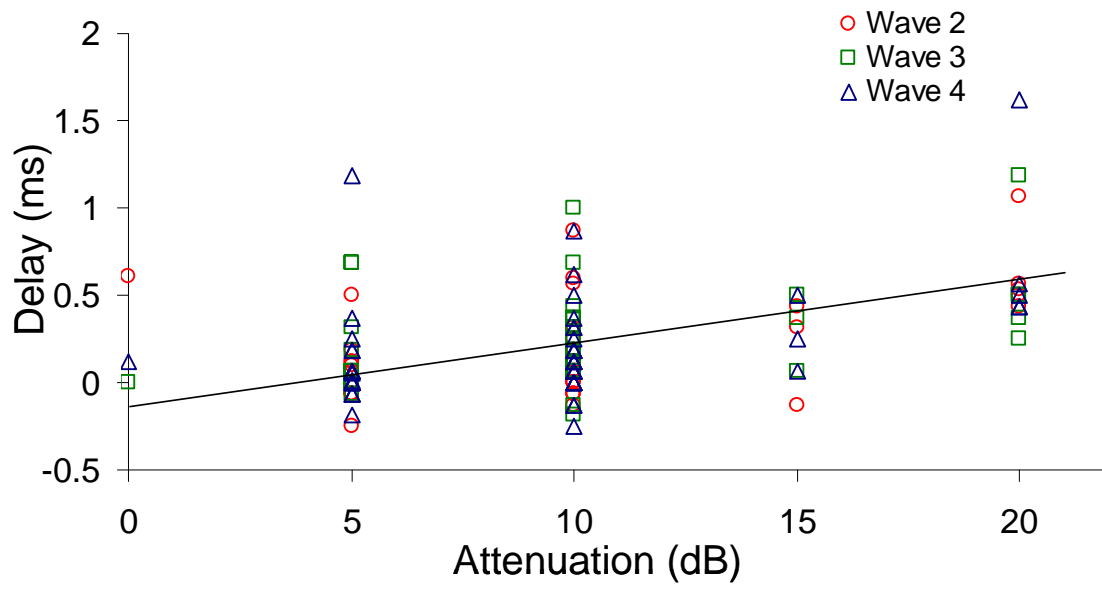

Figure 7.

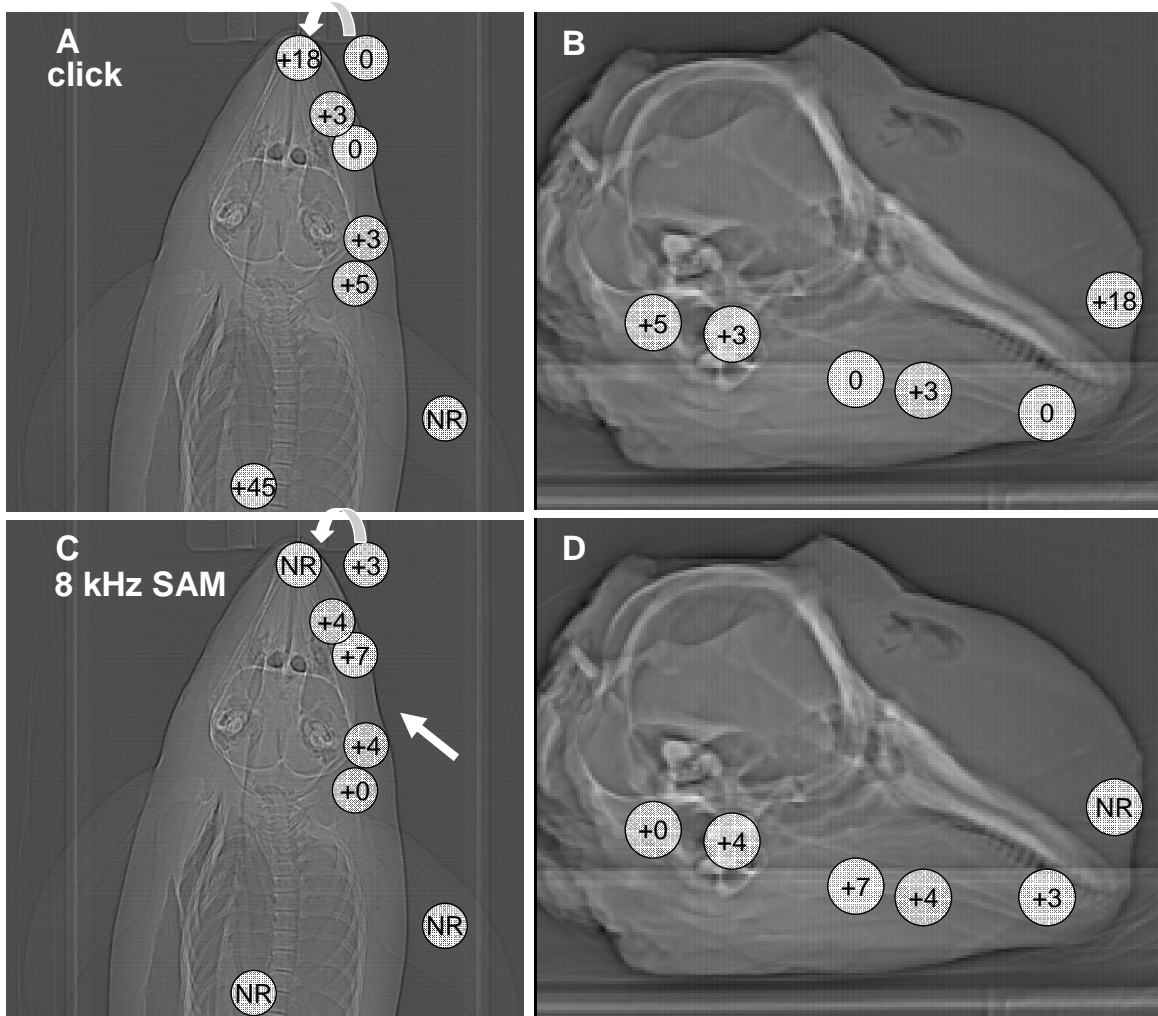

Figure 8.

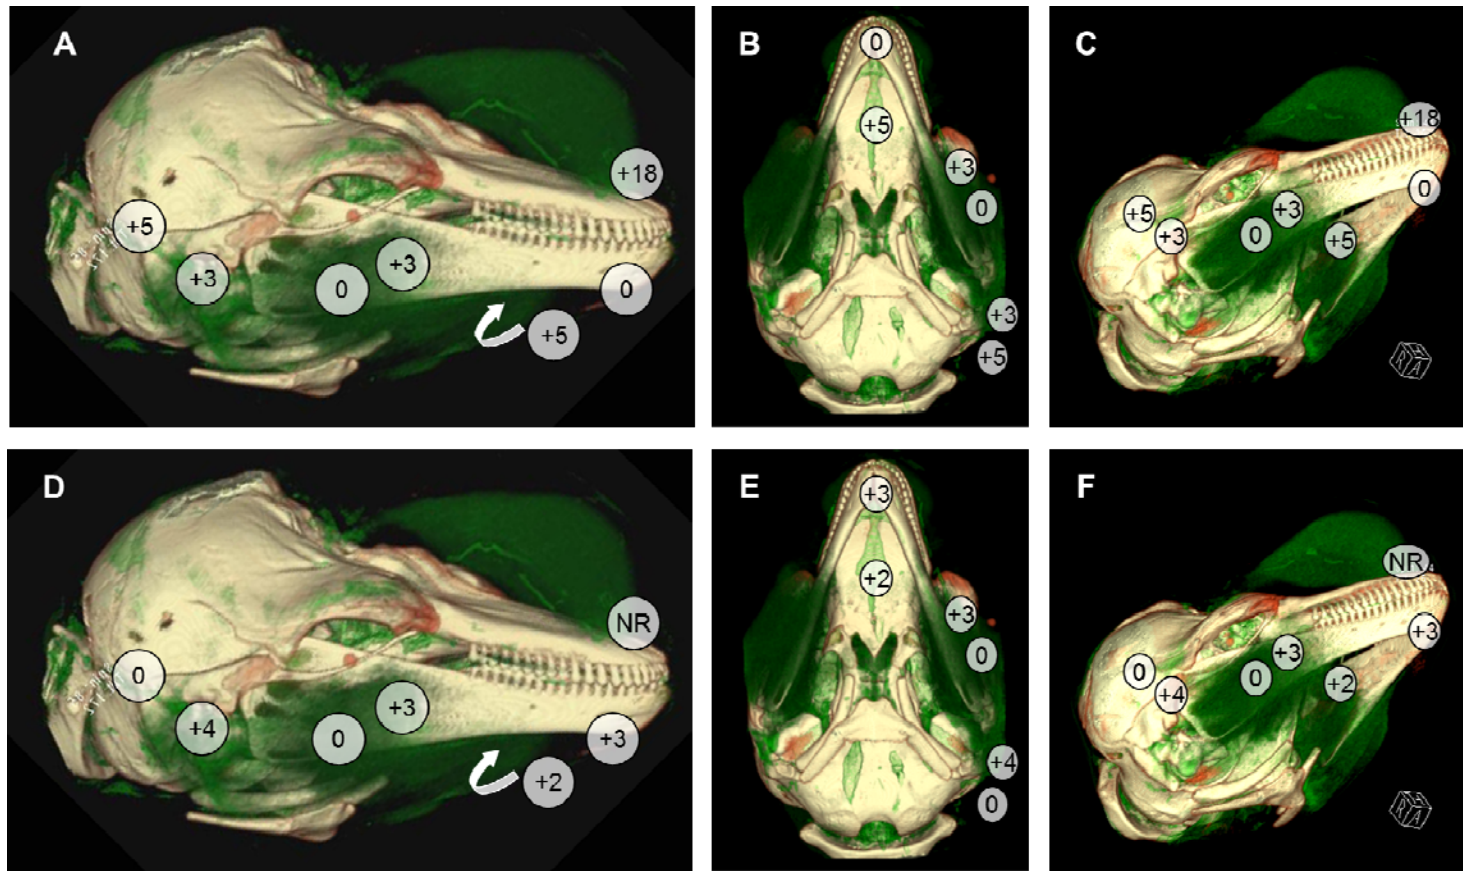

Source: https://cob.silverchair.com/jeb/article-pdf/doi/10.1242/jeb.093773/2037388/jeb_093773.pdf
